# Supplementary material for: A roller-type triboelectric nanogenerator based on rotational friction between wool and stacked interfaces for omnidirectional wind energy harvesting
Source: Royal Society of Chemistry journal article supplement (doi:10.1039/d4nr04358h), 2024-12-09
Supplement: d4nr04358h1.pdf [file d4nr04358h1.pdf]

## Supplementary Information

**Video S1.** The R-TENG drives the calculator.

**Video S2.** The R-TENG drives the thermohygrometer.

**Video S3.** The R-TENG drives more than 720 LEDs.

**Video S4.** The R-TENG drives the electronic clock.

**Video S5.** The R-TENG drives the thermohygrometer (in a moving car).

**Video S6.** The R-TENG drives the electronic clock (at the seaside)

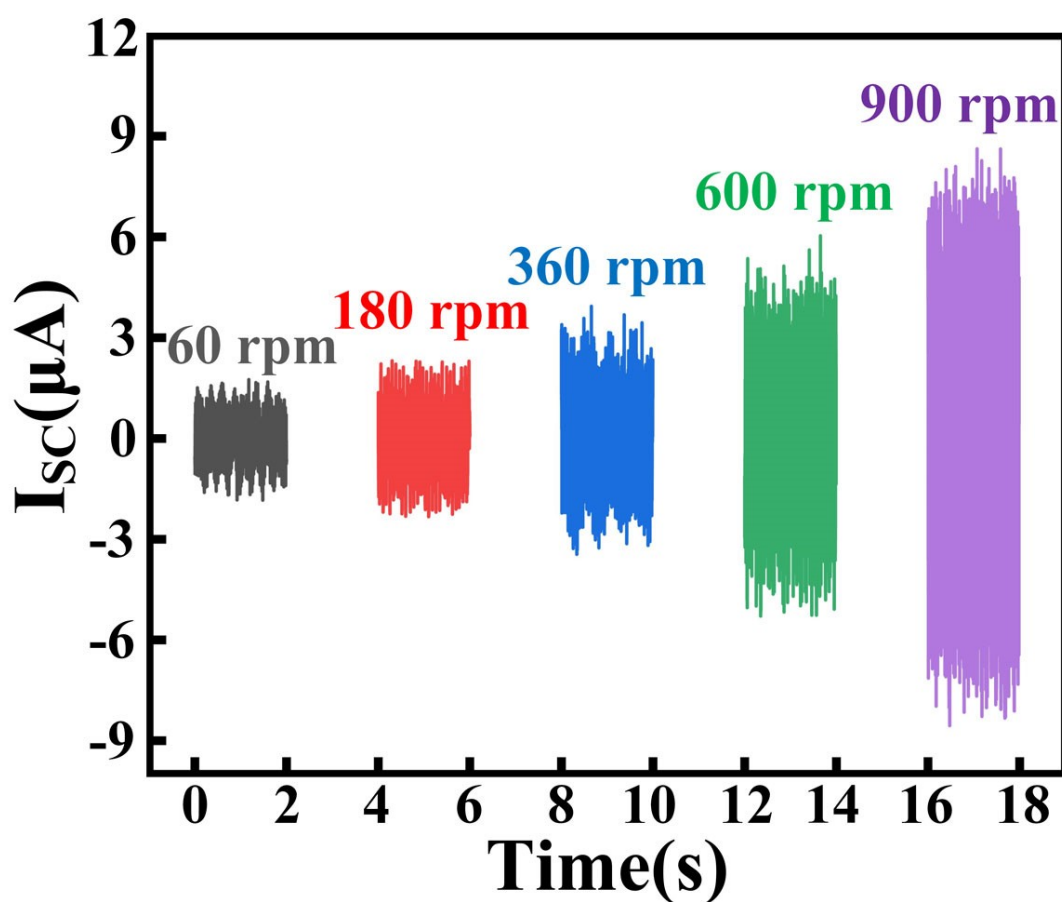

**Fig. S1** The  $I_{sc}$  of the bottom power generation unit at different rotational speeds.

**Table S1** The comparison of previous TENG designs.

| Design | Rotor size | Rotation speed(wind speed) | Triboelectric material   | Performance                                             | Ref       |
|--------|------------|----------------------------|--------------------------|---------------------------------------------------------|-----------|
| R-TENG | 84 mm      | 900 rpm<br>12 m/s          | Wool-PTFE-<br>Copper-FKM | <b>1504</b> V,<br>67.24 $\mu$ A;<br>742 V, 21.9 $\mu$ A | This work |

---



---

|                                 |        |                      |               |                                         |      |
|---------------------------------|--------|----------------------|---------------|-----------------------------------------|------|
| R-DC-TENG                       | 50 mm  | 10 m/s               | Cu-Kapton     | 450 V, 11 $\mu$ A                       | [31] |
| C-TENG                          | 140 mm | 210 rpm<br>12.38 m/s | Cotton-FEP-Al | 782 V, 8.9 $\mu$ A;<br>600 V            | [13] |
| BD-TENG                         | 80 mm  | 900 rpm<br>4 m/s     | Cu-FEP        | 350 V, 38 $\mu$ A;<br>330 V, 7 $\mu$ A  | [12] |
| D-TENG<br>(UD-TENG,<br>LD-TENG) |        | 16.3 m/s             | Cu-FEP        | 220 V, 23 $\mu$ A;<br>270 V, 35 $\mu$ A | [14] |
| G-TENG                          |        |                      | Cu-FEP        | 500 V, 15 $\mu$ A;                      | [32] |

---
